# Supplementary material for: Striated muscle-specific base editing enables correction of mutations causing dilated cardiomyopathy
Source: PubMed Central journal article supplement (PMC10287752; doi:10.1038/s41467-023-39352-1), 2023-06-22
Supplement: 41467_2023_39352_MOESM4_ESM.pdf [file 41467_2023_39352_MOESM4_ESM.pdf]

**Title:** Supplementary data 1:

**Description:** List of significantly differentially expressed genes in P635L HET, P635L HOM, R636Q HET and R636Q HOM relative to WT

**Title:** Supplementary data 2:

**Description:** List of significantly differentially spliced events in P635L HET, P635L HOM, R636Q HET and R636Q HOM relative to WT

**Title:** Supplementary data 3:

**Description:** List of significantly differentially expressed genes in different cell types based on snRNA-seq including candidate genes for analysis in Fig. 4e-g

**Title:** Supplementary data 4:

**Description:** Mapping statistics of NGS experiments including WGS coverage

**Title:** Supplementary data 5:

**Description:** Tissue-specific variants found by WGS Supplementary data 6: Sequences of oligonucleotides used in this study
